# Supplementary material
Source: PubMed Central journal article supplement (PMC5479624)
Supplement: 2016.147116.Attarbaschi_suppl.pdf [file 2016.147116.Attarbaschi_suppl.pdf]

## Non-Hodgkin lymphoma and pre-existing conditions: spectrum, clinical characteristics and outcome in 213 children and adolescents

Andishe Attarbaschi,<sup>1</sup> Elisa Carraro,<sup>2</sup> Oussama Ablu,<sup>3</sup> Shlomit Barzilai-Birenboim,<sup>4</sup> Simon Bomken,<sup>5</sup> Laurence Brugieres,<sup>6</sup> Eva Bubanska,<sup>7</sup> Birgit Burkhardt,<sup>8</sup> Alan K.S. Chiang,<sup>9</sup> Monika Csoka,<sup>10</sup> Alina Fedorova,<sup>11</sup> Janez Jazbec,<sup>12</sup> Edita Kabickova,<sup>13</sup> Zdenka Krenova,<sup>14</sup> Jelena Lazic,<sup>15</sup> Jan Loeffen,<sup>16</sup> Georg Mann,<sup>1</sup> Felix Niggli,<sup>17</sup> Natalia Miakova,<sup>18</sup> Tomoo Osumi,<sup>19</sup> Leila Ronceray,<sup>1</sup> Anne Uyttebroeck,<sup>20</sup> Denise Williams,<sup>21</sup> Wilhelm Woessmann,<sup>22</sup> Grazyna Wrobel<sup>23</sup> and Marta Pillon;<sup>2</sup> on behalf of the European Intergroup for Childhood Non-Hodgkin Lymphoma (EICNHL) and the International Berlin-Frankfurt-Münster (i-BFM) Study Group

<sup>1</sup>Pediatric Hematology and Oncology, St. Anna Children's Hospital, Medical University of Vienna, Austria; <sup>2</sup>Pediatric Hematology and Oncology, University of Padova, Italy; <sup>3</sup>Department of Pediatrics, Division of Hematology and Oncology, Hospital for Sick Children, Toronto, Canada; <sup>4</sup>Pediatric Hematology and Oncology, Schneider Children's Medical Center of Israel, Petah-Tivka, Israel and Sackler Faculty of Medicine, Tel Aviv University, Israel; <sup>5</sup>Northern Institute for Cancer Research, Newcastle University, UK; <sup>6</sup>Department of Pediatric Oncology, Institute Gustave-Roussy, Villejuif, France; <sup>7</sup>Department of Pediatric Oncology and Hematology, University Children's Hospital, Banská Bystrica, Slovakia; <sup>8</sup>Pediatric Hematology and Oncology, University of Münster, Germany; <sup>9</sup>Department of Pediatrics and Adolescent Medicine, Li Ka Shing Faculty of Medicine, The University of Hong Kong, Queen Mary Hospital, Pokfulam, Hong Kong; <sup>10</sup>Pediatric Hematology and Oncology, Semmelweis University, Budapest, Hungary; <sup>11</sup>Belarusian Research Center for Pediatric Oncology, Hematology and Immunology, Minsk, Belarus; <sup>12</sup>Division of Pediatrics, Hematology and Oncology, University Medical Center Ljubljana, Slovenia; <sup>13</sup>Pediatric Hematology and Oncology, Charles University and University Hospital Motol, Prague, Czech Republic; <sup>14</sup>Pediatric Hematology and Oncology, University Hospital, Brno, Czech Republic; <sup>15</sup>Pediatric Hematology and Oncology, University Children's Hospital, School of Medicine University of Belgrade, Serbia; <sup>16</sup>Pediatric Hematology and Oncology, Erasmus MC - Sophia Children's Hospital, Rotterdam, the Netherlands; <sup>17</sup>Pediatric Hematology and Oncology, University Hospital, Zurich, Switzerland; <sup>18</sup>Pediatric Hematology and Oncology, Federal Center for Pediatric Hematology, Oncology and Immunology, Moscow, Russia; <sup>19</sup>Children's Cancer Center, National Center for Child Health and Development, Tokyo, Japan; <sup>20</sup>Pediatric Hematology and Oncology, University Hospitals Leuven, Belgium; <sup>21</sup>Pediatric Hematology and Oncology, Cambridge University Hospitals Foundation Trust, Addenbrooke's Hospital, Cambridge, UK; <sup>22</sup>Pediatric Hematology and Oncology, Justus Liebig University, Giessen, Germany and <sup>23</sup>Bone Marrow Transplantation and Pediatric Hematology and Oncology, Wroclaw Medical University, Poland

©2016 Ferrata Storti Foundation. This is an open-access paper. doi:10.3324/haematol.2016.147116

Received: March 30, 2016.

Accepted: August 9, 2016.

Pre-published: August 11, 2016.

Correspondence: andishe.attarbaschi@stanna.at

## Invitation Letter:

Padua, 23 May, 2014

Dear Colleagues,

During the last international BFM (i-BFM) meeting in Prague, it was decided to perform a collaborative study among i-BFM countries (members) and centres to collect retrospective data of patients with non-Hodgkin's Lymphomas (NHL) who have been affected by constitutional (genetic) syndromes. We all know that incidence of cancer in patients with confirmed or suspected genetic syndromes is higher than in the healthy population. In addition, patients with concomitant genetic disorders are often not eligible for standard treatment and/or therapy is reduced/modified by individual decisions of the treating physicians. Solid outcome data are not available yet, although some groups have reported that NHL patients with underlying genetic syndromes perform quite well.

The aim of this multi-national study is to gather broad information on the clinical characteristics, treatment and outcome of this specific patient population. We would like to restrict this study to patients who have been treated in the period from 1984 until end of 2013 and to standard data that should be available for most of the patients.

In the attachment you will find an excel file with the listed information/parameters that we would like to collect for every patient. It would be great if we could get the data until the end of October 2014 which then will be analysed in Padua.

If you have any questions concerning the project or the data needed by us, please feel free to contact me at the e-mail address [marta.pillon@unipd.it](mailto:marta.pillon@unipd.it) or Andishe Attarbaschi at the email address [andishe.attarbaschi@stanna.at](mailto:andishe.attarbaschi@stanna.at). We hope that after the successful project on follicular lymphoma we can have another fruitful cooperation allowing us both to learn more about the spectrum of constitutional syndromes involved in children and adolescents with NHL and to have a nice publication under the umbrella of i-BFM (and EICNHL). As for the follicular lymphoma project, countries and study groups being members of EICNHL (if it is ok for you Denise?) but not of NHL i-BFM will also be invited to take part, being another step forward in bringing both cooperative groups closer to each other.

Thank you for your cooperation.

Sincerely,

Marta Pillon  
Coordinator of the AIEOP NHL Working Group  
and of the i-BFM project on NHL in genetic syndromes

Andishe Attarbaschi  
NHL i-BFM Chair  
St. Anna Children's Hospital

**Suppl. Table 1. Questionnaire sent out to the groups and centers**

Country/Group/Center  
Patient No.  
Date of birth  
Gender  
Date of diagnosis  
Histological subtype  
Immunology  
Associated genetic condition  
Pre-treatment LDH  
Stage of disease  
Sites of involvement  
Risk group  
Treatment protocol  
Modifications from protocol  
Date of complete remission  
Event (yes/no)  
Type of event  
Date of event  
Second-line therapy  
Radiotherapy (yes/no); dose  
Stem cell transplantation (yes/no); type  
Death  
Date of death  
Cause of death  
Date of last follow-up  
Remarks

**Suppl. Table 2. Clinical and laboratory characteristics and outcome of NHL patients in cancer predisposition syndromes (n<3 patients)**

| Pre-existing condition                  | Gender | Age at dg. | Histology       | LDH   | Stage of disease | Relapse/ progression | SML | Death | Disease-related death | Therapy-related death | Follow-up |
|-----------------------------------------|--------|------------|-----------------|-------|------------------|----------------------|-----|-------|-----------------------|-----------------------|-----------|
| Abernethy malformation type I           | male   | 6.92       | B-NHL n. f. sp. | 452   | I                | no                   | no  | no    |                       |                       | 2.98 & CR |
| ALPS                                    | male   | 0.19       | T-LBL           | 320   | n. a.            | no                   | no  | yes   | no                    | yes                   |           |
| DNA ligase deficiency                   | female | 2.33       | DLBCL           | 1827  | IV               | yes                  | no  | yes   | yes                   | no                    |           |
| IL7R- $\alpha$ deficiency               | female | 0.59       | DLBCL           | 1379  | III              | no                   | no  | no    |                       |                       | 5.98 & CR |
| Cartilage hair syndrome                 | female | 1.77       | DLBCL           | n. a. | III              | no                   | no  | yes   | no                    | yes                   |           |
| Cartilage hair syndrome                 | female | 4.28       | DLBCL           | n. a. | n. a.            | no                   | no  | no    |                       |                       | 9.02 & CR |
| Common gamma chain deficiency           | male   | 0.44       | ALCL            | 426   | n. a.            | no                   | no  | no    |                       |                       | 17.67& CR |
| Fanconi anemia                          | male   | 12.93      | T-LBL           | 871   | III              | yes                  | no  | yes   | no                    | Yes                   |           |
| Hyper-IgE syndrome                      | female | 3.50       | Burkitt         | 316   | IV               | no                   | no  | no    |                       |                       | 7.75 & CR |
| Hyper-IgE syndrome                      | male   | 13.57      | DLBCL           | 299   | II               | yes                  | no  | no    |                       |                       | 5.56 & CR |
| Hyper-IgM syndrome                      | female | 11.73      | MZL             | 353   | III              | yes                  | no  | no    |                       |                       | 5.11 & CR |
| Hyper-IgM syndrome                      | female | 14.60      | DLBCL           | 502   | III              | no                   | no  | yes   | no                    | yes                   |           |
| IL-2 inducible T-cell kinase deficiency | male   | 0.77       | DLBCL           | n. a. | III              | no                   | no  | no    |                       |                       | 1.66 & CR |
| Li-Fraumeni syndrome                    | male   | 6.10       | DLBCL           | 1246  | III              | no                   | no  | no    |                       |                       | 5.29 & CR |
| Noonan-like syndrome                    | male   | 7.00       | Burkitt         | n. a. | II               | no                   | no  | no    |                       |                       | 5.87 & CR |
| Rothmund-Thomson syndrome               | female | 3.30       | T-NHL           | 390   | II               | no                   | no  | yes   | no                    | yes                   |           |
| Sotos syndrome                          | male   | 12.88      | T-LBL           | 224   | IV               | no                   | no  | no    |                       |                       | 9.23 & CR |
| STK4 deficiency                         | female | 11.79      | MALT lymphoma   | n. a. | II               | no                   | no  | no    |                       |                       | 0.33 & CR |

**Abbreviations:** dg., diagnosis; LDH, lactate dehydrogenase; SML, secondary malignancy; ALPS, autoimmune lymphoproliferative syndrome; B-NHL, mature B-cell non-Hodgkin's lymphoma; T-LBL, T-cell lymphoblastic lymphoma; BCP-LBL, B-cell precursor lymphoblastic lymphoma; ALCL, anaplastic large cell lymphoma; DLBCL, diffuse large B-cell lymphoma; MZL, marginal zone lymphoma; MALT, mucosa-associated lymphoid tissue lymphoma; n. a., not available; n. f. sp., not further specified; CR, in complete remission

**Suppl. Table 3. Clinical and laboratory characteristics and outcome of NHL patients in each one category of genetic diseases and syndromes not further specified (n>2 patients)**

|                     | G6PD deficiency | Developmental delay |
|---------------------|-----------------|---------------------|
| No. of patients     | 4               | 8                   |
| Gender              |                 |                     |
| male                | 3               | 7                   |
| female              | 1               | 1                   |
| Age (years) at dg.  |                 |                     |
| median              | 8.66            | 13.06               |
| range               | 2.94-15.55      | 4.34-16.7           |
| Histology           |                 |                     |
| Mature B-NHL        | 4               | 5                   |
| Burkitt lymphoma    | 2               | 3                   |
| DLBCL               | 2               | 2                   |
| T-LBL               | 0               | 2                   |
| BCP-LBL             | 0               | 0                   |
| ALCL                | 0               | 1                   |
| Stage of disease    |                 |                     |
| I                   | 0               | 0                   |
| II                  | 2               | 3                   |
| III                 | 2               | 4                   |
| IV                  | 0               | 1                   |
| LDH                 |                 |                     |
| ≥500 U/l            | 3               | 5                   |
| <500 U/l            | 1               | 2                   |
| not available       | 0               | 1                   |
| Relapse/progression | 0               | 2                   |
| Second malignancy   | 0               | 0                   |
| Death               |                 |                     |
| disease-related     | 0               | 2                   |
| therapy-related     | 0               | 0                   |
| in CR               | 4               | 6                   |
| Follow-up (years)   |                 |                     |
| median              | 2.9             | 5.92                |
| range               | 1.05-4.95       | 1.39-11.78          |

**Abbreviations:** G6PH, Glucose-6-phosphate dehydrogenase; No., number; dg., diagnosis; B-NHL, B-cell non-Hodgkin's lymphoma; T-LBL, T-cell lymphoblastic lymphoma; BCP-LBL, B-cell precursor lymphoblastic lymphoma; ALCL, anaplastic large cell lymphoma; PTCL, peripheral T-cell lymphoma; DLBCL, diffuse large B-cell lymphoma; LDH, lactate dehydrogenase; SML, secondary malignancy; CR, complete remission

**Suppl. Table 4. Clinical and laboratory characteristics and outcome of NHL patients in genetic diseases not known to be associated with an increased cancer risk (n<3 patients)**

| Pre-existing condition                 | Gender | Age at dg. | Histology       | LDH   | Stage of disease | Relapse/ progression | SML | Death | Disease-related death | Therapy-related death | Follow-up     |
|----------------------------------------|--------|------------|-----------------|-------|------------------|----------------------|-----|-------|-----------------------|-----------------------|---------------|
| α-1-antitrypsin deficiency             | male   | 2.48       | PTCL            | 624   | III              | yes                  | no  | yes   | yes                   | no                    |               |
| α-1-antitrypsin deficiency             | male   | 2.19       | Burkitt         | 888   | IV               | yes                  | no  | yes   | no                    | yes                   |               |
| Baller-Gerold syndrome                 | female | 2.42       | PTCL*           | 550   | n. a.            | no                   | no  | no    |                       |                       | 11.35 & in CR |
| Bare lymphocyte syndrome               | female | 18.70      | DLBCL           | 243   | III              | no                   | no  | yes   | no                    | yes                   |               |
| Congenital dyserythropoetic anemia     | female | 6.03       | B-NHL n. f. sp. | 99    | IV               | yes                  | no  | no    |                       |                       | 8.35 & in CR  |
| Charcot-Marie-Tooth disease            | male   | 10.21      | Burkitt         | 337   | II               | no                   | no  | no    |                       |                       | 4.96 & in CR  |
| CTP synthase 1 deficiency              | male   | 1.05       | DLBCL           | n. a. | n. a.            | yes                  | no  | no    |                       |                       | 2.61 & in CR  |
| Cystic fibrosis                        | female | 14.67      | DLBCL           | 658   | II               | no                   | no  | yes   | no                    | yes                   |               |
| Cystic fibrosis                        | female | 7.43       | Burkitt         | 245   | I                | no                   | no  | no    |                       |                       | 0.40 & in CR  |
| Duane syndrome                         | male   | 16.55      | DLBCL           | 339   | I                | no                   | no  | no    |                       |                       | 1.23 & in CR  |
| Factor VII deficiency                  | female | 14.54      | PMLBCL          | 3417  | IV               | yes                  | no  | yes   | yes                   | no                    |               |
| Factor XII deficiency                  | male   | 6.60       | Burkitt         | 384   | II               | no                   | no  | no    |                       |                       | 6.77 & in CR  |
| Gaucher syndrome                       | male   | 9.83       | DLBCL           | 680   | II               | no                   | no  | no    |                       |                       | 0.87 & in CR  |
| Hemophilia A                           | male   | 14.41      | Burkitt         | 345   | I                | no                   | No  | no    |                       |                       | 12.08 & in CR |
| Hemophilia A                           | male   | 14.67      | Burkitt         | 1524  | IV               | no                   | No  | no    |                       |                       | 1.30 & in CR  |
| Hirschsprung's disease                 | male   | 4.99       | DLBCL           | 598   | III              | yes                  | No  | yes   | yes                   | no                    |               |
| Kabuki syndrome                        | male   | 5.93       | Burkitt         | 1075  | III              | no                   | No  | no    |                       |                       | 0.39 & in CR  |
| Kartagener syndrome                    | male   | 4.66       | T-LBL           | 552   | III              | yes                  | No  | yes   | yes                   | no                    |               |
| Marfan syndrome                        | male   | 13.90      | DLBCL           | 616   | III              | no                   | No  | no    |                       |                       | 1.53 & in CR  |
| Duchenne muscular dystrophy            | male   | 5.27       | ALCL            | 954   | II               | yes                  | No  | no    |                       |                       | 3.55 & in CR  |
| Myotonic dystrophy Curschmann-Steinert | male   | 4.15       | BCP-LBL         | n. a. | III              | no                   | No  | no    |                       |                       | 5.91 & in CR  |
| Congenital Finish nephrosis            | female | 12.91      | ALCL            | n. a. | III              | no                   | No  | no    |                       |                       | 8.68 & in CR  |
| Rett syndrome                          | female | 11.56      | ALCL            | 312   | III              | no                   | No  | no    |                       |                       | 12.62 & in CR |
| Waardenburg syndrome                   | female | 14.07      | B-NHL           | 1652  | III              | yes                  | No  | yes   | no                    | yes                   |               |
| Smith-Magenis syndrome                 | male   | 12.51      | T-LBL           | 342   | IV               | yes                  | No  | yes   | no                    | yes                   |               |
| Silver-Russell syndrome                | male   | 16.86      | DLBCL           | 224   | II               | no                   | No  | no    |                       |                       | 4.64 & in CR  |

|                                   |        |       |         |       |       |     |    |     |     |    |               |
|-----------------------------------|--------|-------|---------|-------|-------|-----|----|-----|-----|----|---------------|
| Williams-Beuren syndrome          | male   | 5.80  | Burkitt | 11937 | III   | yes | No | no  |     |    | 5.50 & in CR  |
| Williams-Beuren syndrome          | male   | 3.94  | Burkitt | 5589  | III   | no  | No | no  |     |    | 9.51 & in CR  |
| Cri-du-chat syndrome              | male   | 11.44 | Burkitt | 1030  | III   | no  | No | no  |     |    | 3.89 & in CR  |
| Chromosomal aberrations n. f. sp. | male   | 4.93  | Burkitt | 743   | IV    | no  | No | no  |     |    | 13.76 & in CR |
| 22q11.2 deletion syndrome         | female | 8.30  | PTCL    | n. a. | IV    | yes | No | yes | yes | no |               |
| Turner syndrome                   | female | 11.04 | T-LBL   | 582   | II    | no  | No | no  |     |    | 18.80 & in CR |
| Triple X syndrome                 | female | 11.24 | ALCL    | 248   | II    | no  | No | no  |     |    | 2.24 & in CR  |
| Klinefelter syndrome              | male   | 14.76 | ALCL    | 173   | II    | no  | No | no  |     |    | 18.38 & in CR |
| Prader-Labhart-Willi syndrome     | female | 17.21 | BCP-LBL | n. a. | II    | no  | No | no  |     |    | 5.05 & in CR  |
| Prader-Labhart-Willi syndrome     | male   | 7.46  | other** | 2910  | n. a. | no  | No | no  |     |    | 8.59 & in CR  |

**Abbreviations:** dg., diagnosis; LDH, lactate dehydrogenase; SML, secondary malignancy; B-NHL, mature B-cell non-Hodgkin's lymphoma; T-LBL, T-cell lymphoblastic lymphoma; BCP-LBL, B-cell precursor lymphoblastic lymphoma; ALCL, anaplastic large cell lymphoma; PTCL, peripheral T-cell lymphoma; DLBCL, diffuse large B-cell lymphoma; PMLBCL, primary mediastinal large B-cell lymphoma; n. a., not available; n. f. sp., not further specified; CR, complete remission

\*NK-cell lymphoma

\*\*biphenotypic lymphoblastic lymphoma



**Suppl. Table 5. Clinical and laboratory characteristics and outcome of NHL patients with underlying multifactorial diseases (n=7 patients), organ malformations (n=5 patients) and syndromes not further specified (n=2 patients)**

| Type of condition      | Pre-existing condition                                  | Gender | Age at dg. | Histology | LDH   | Stage of disease | Relapse/ progression | SML | Death | Disease-related death | Therapy-related death | Follow-up |
|------------------------|---------------------------------------------------------|--------|------------|-----------|-------|------------------|----------------------|-----|-------|-----------------------|-----------------------|-----------|
| Multifactorial disease | Congenital hearing loss                                 | male   | 15.97      | PMLBCL    | 197   | IV               | no                   | no  | no    |                       |                       | 1.95 & CR |
| Multifactorial disease | autism                                                  | male   | 6.08       | Burkitt   | 5313  | IV               | no                   | no  | no    |                       |                       | 7.50 & CR |
| Multifactorial disease | autism                                                  | female | 9.73       | DLBCL     | 854   | III              | yes                  | no  | yes   | yes                   | no                    |           |
| Multifactorial disease | Autoimmune enteropathy                                  | male   | 1.28       | DLBCL     | n. a. | n. a.            | yes                  | no  | yes   | no                    | yes                   |           |
| Multifactorial disease | Familial myoclonic epilepsy                             | female | 17.83      | Burkitt   | 1141  | III              | no                   | no  | no    |                       |                       | 2.23 & CR |
| Multifactorial disease | Familial myoclonic epilepsy                             | male   | 3.41       | Burkitt   | 1917  | III              | yes                  | no  | yes   | yes                   | no                    |           |
| Multifactorial disease | Gilles de la Tourette syndrome                          | female | 10.90      | Burkitt   | 294   | IV               | no                   | no  | yes   | no                    | yes                   |           |
| Organ malformation     | Polymicrogyria                                          | male   | 13.12      | T-LBL     | 1308  | III              | no                   | no  | no    |                       |                       | 4.95 & CR |
| Organ malformation     | Congenital heart disease                                | male   | 4.04       | T-LBL     | n. a. | n. a.            | yes                  | no  | yes   | yes                   | no                    |           |
| Organ malformation     | Partial agenesis of corpus callosum                     | male   | 9.67       | T-LBL     | 1000  | IV               | no                   | no  | no    |                       |                       | 2.76 & CR |
| Organ malformation     | Kidney agenesis                                         | male   | 8.93       | Burkitt   | 226   | IV               | yes                  | no  | yes   | no                    | yes                   |           |
| Organ malformation     | Agenesis of the phalanges of hand and foot              | female | 13.61      | DLBCL     | 332   | III              | no                   | no  | no    |                       |                       | 6.78 & CR |
| Syndrome n. f. sp.     | Prematurity, single kidney, dysmorphic spinal vertebrae | male   | 3.21       | T-LBL     | n. a. | III              | no                   | no  | no    |                       |                       | 14.7 & CR |
| Syndrome n. f. sp.     | Congenital heart disease, facial dysmorphism, deafness  | female | 5.81       | ALCL      | 313   | III              | no                   | no  | yes*  | no                    | no                    |           |

**Abbreviations:** dg., diagnosis; LDH, lactate dehydrogenase; SML, secondary malignancy; n. f. sp., not further specified; T-LBL, T-cell lymphoblastic lymphoma; ALCL, anaplastic large cell lymphoma; DLBCL, diffuse large B-cell lymphoma; PMLBCL, primary mediastinal large B-cell lymphoma; n. a., not available; CR; in complete remission

\*heart failure while waiting for heart transplantation

**Suppl. Table 6. Clinical and laboratory characteristics and outcome of NHL patients with a pre-existing condition who developed a secondary malignancy (n=21)**

| Pre-existing condition | Gender | Age at dg. | Histology           | LDH   | Stage of disease | Secondary malignancy          | Death | Disease-related death | Treatment-related death | SML-related death | Follow-up    |
|------------------------|--------|------------|---------------------|-------|------------------|-------------------------------|-------|-----------------------|-------------------------|-------------------|--------------|
| NBS                    | female | 12.78      | T-NHL               | 1200  | III              | DLBCL                         | yes   | no                    | yes                     | no                |              |
| CMMRD                  | male   | 7.66       | T-LBL               | n. a. | III              | colorectal carcinoma          | no    |                       |                         |                   | 9.26 & in CR |
| NBS                    | male   | 4.69       | T-LBL               | 378   | IV               | other lymphoma*               | yes   | yes                   | no                      | no                |              |
| CMMRD                  | male   | 4.35       | T-LBL               | 1310  | III              | brain tumor n. f. sp.         | no    |                       |                         |                   | 4.10 & in CR |
| CMMRD                  | male   | 5.13       | T-LBL               | 648   | III              | clonally diverse T-NHL        | yes   | no                    | no                      | yes               |              |
| CMMRD                  | male   | 17.97      | Burkitt             | 2697  | III              | colorectal carcinoma          | yes   | no                    | no                      | yes               |              |
| CMMRD                  | female | 13.60      | T-LBL               | 489   | III              | colorectal carcinoma          | yes   | no                    | no                      | yes               |              |
| CMMRD                  | male   | 6.28       | T-LBL               | n. a. | III              | brain tumor (glioblastoma)    | yes   | no                    | no                      | yes               |              |
| CMMRD                  | male   | 4.62       | T-LBL               | n. a. | III              | brain tumor (glioblastoma)    | yes   | no                    | no                      | yes               |              |
| WAS                    | male   | 6.32       | Burkitt             | 285   | III              | clonally diverse mature B-NHL | yes   | n. a.                 | n. a.                   | n.a.              |              |
| NBS                    | female | 10.93      | DLBCL               | 1157  | III              | NHL n. f. sp.                 | yes   | no                    | no                      | yes               |              |
| CMMRD                  | male   | 3.03       | BCP-LBL             | 751   | IV               | brain tumor (glioblastoma)    | yes   | no                    | no                      | yes               |              |
| CMMRD                  | female | 7.75       | T-LBL               | n. a. | III              | myelodysplastic syndrome      | yes   | no                    | no                      | yes               |              |
| AT                     | male   | 8.91       | DLBCL               | 224   | III              | hepatoblastoma                | yes   | no                    | no                      | yes               |              |
| NF1                    | male   | 3.38       | T-LBL               | 213   | III              | acute myeloid leukemia        | yes   | no                    | no                      | yes               |              |
| AT                     | male   | 11.90      | DLBCL               | 193   | II               | clonally diverse mature B-NHL | yes   | no                    | n. a.                   | n. a.             |              |
| AT                     | male   | 5.53       | DLBCL               | 322   | III              | clonally diverse mature B-NHL | yes   | no                    | no                      | yes               |              |
| NBS                    | female | 9.48       | plasmablastic B-NHL | 204   | III              | acute lymphatic leukemia      | yes   | no                    | no                      | yes               |              |
| CMMRD                  | female | 6.47       | T-LBL               | 206   | III              | colorectal carcinoma          | yes   | no                    | no                      | yes               |              |
| CMMRD                  | male   | 16.21      | T-LBL               | n. a. | III              | brain tumor (glioblastoma)    | yes   | no                    | no                      | yes               |              |
| XLP                    | male   | 4.77       | DLBCL               | 355   | II               | clonally diverse mature B-NHL | no    |                       |                         |                   | 9.19 & in CR |

**Abbreviations:** dg., diagnosis; NBS, Nijmegen breakage syndrome; CMMRD, constitutional mismatch repair disease; WAS, Wiskott-Aldrich syndrome; AT, ataxia telangiectasia; NF1, neurofibromatosis type 1; XLP, X-linked lymphoproliferative syndrome; LDH, lactate dehydrogenase; SML, secondary malignancy; n. f. sp., not further specified; B-NHL, mature B-cell non-Hodgkin's lymphoma; T-LBL, T-cell lymphoblastic lymphoma; DLBCL, diffuse large B-cell lymphoma; n. a., not available; CR, complete remission

\*blastic plasmacytoid dendritic cell lymphoma

**Suppl. Table 7. Outcome of the 3 major histological subgroups among the 5 largest distinct groups of pre-existing conditions (>20 patients)**

**A) Number of patients with and without events**

| AT    |              |                |           |          |
|-------|--------------|----------------|-----------|----------|
|       | mature B-NHL | T- and BCP-LBL | other NHL | all NHLs |
| event |              |                |           |          |
| no    | 7            | 1              | 0         | 8        |
| yes   | 20           | 1              | 3         | 24       |
|       |              |                |           | 32       |

| NBS   |              |                |           |          |
|-------|--------------|----------------|-----------|----------|
|       | mature B-NHL | T- and BCP-LBL | other NHL | all NHLs |
| event |              |                |           |          |
| no    | 5            | 2              | 0         | 7        |
| yes   | 6            | 2              | 11        | 19       |
|       |              |                |           | 26       |

| CMMRD |              |                |           |          |
|-------|--------------|----------------|-----------|----------|
|       | mature B-NHL | T- and BCP-LBL | other NHL | all NHLs |
| event |              |                |           |          |
| no    | 1            | 2              | 0         | 3        |
| yes   | 2            | 16             | 0         | 18       |
|       |              |                |           | 21       |

| PID n. f. sp. |              |                |           |          |
|---------------|--------------|----------------|-----------|----------|
|               | mature B-NHL | T- and BCP-LBL | other NHL | all NHLs |
| event         |              |                |           |          |
| no            | 9            | 0              | 3         | 12       |
| yes           | 12           | 1              | 2         | 15       |
|               |              |                |           | 27       |

| Genetic diseases |              |                |           |          |
|------------------|--------------|----------------|-----------|----------|
|                  | mature B-NHL | T- and BCP-LBL | other NHL | all NHLs |
| event            |              |                |           |          |
| no               | 17           | 3              | 5         | 25       |
| yes              | 9            | 2              | 4         | 15       |
|                  |              |                |           | 40       |

## B) Number of patients with and without relapse/progression

| AT                  |              |                |           |          |
|---------------------|--------------|----------------|-----------|----------|
|                     | mature B-NHL | T- and BCP-LBL | other NHL | all NHLs |
| relapse/progression |              |                |           |          |
| no                  | 24           | 2              | 1         | 27       |
| yes                 | 3            | 0              | 2         | 5        |
|                     |              |                |           | 32       |

| NBS                 |              |                |           |          |
|---------------------|--------------|----------------|-----------|----------|
|                     | mature B-NHL | T- and BCP-LBL | other NHL | all NHLs |
| relapse/progression |              |                |           |          |
| no                  | 9            | 4              | 3         | 16       |
| yes                 | 3            | 1              | 6         | 10       |
|                     |              |                |           | 26       |

| CMMRD               |              |                |           |          |
|---------------------|--------------|----------------|-----------|----------|
|                     | mature B-NHL | T- and BCP-LBL | other NHL | all NHLs |
| relapse/progression |              |                |           |          |
| no                  | 2            | 12             | 0         | 14       |
| yes                 | 1            | 6              | 0         | 7        |
|                     |              |                |           | 21       |

| PID n. f. sp.       |              |                |           |          |
|---------------------|--------------|----------------|-----------|----------|
|                     | mature B-NHL | T- and BCP-LBL | other NHL | all NHLs |
| relapse/progression |              |                |           |          |
| no                  | 18           | 0              | 5         | 23       |
| yes                 | 3            | 1              | 0         | 4        |
|                     |              |                |           | 27       |

| Genetic diseases    |              |                |           |          |
|---------------------|--------------|----------------|-----------|----------|
|                     | mature B-NHL | T- and BCP-LBL | other NHL | all NHLs |
| relapse/progression |              |                |           |          |
| no                  | 19           | 3              | 6         | 28       |
| yes                 | 7            | 2              | 3         | 12       |
|                     |              |                |           | 40       |

### C) Number of patients with and without a toxic death as a first event

| AT                         |              |                |           |          |
|----------------------------|--------------|----------------|-----------|----------|
|                            | mature B-NHL | T- and BCP-LBL | other NHL | all NHLs |
| toxic death as first event |              |                |           |          |
| no                         | 15           | 1              | 2         | 18       |
| yes                        | 12           | 1              | 1         | 14       |
|                            |              |                |           | 32       |

| NBS                        |              |                |           |          |
|----------------------------|--------------|----------------|-----------|----------|
|                            | mature B-NHL | T- and BCP-LBL | other NHL | all NHLs |
| toxic death as first event |              |                |           |          |
| no                         | 10           | 4              | 6         | 20       |
| yes                        | 2            | 1              | 3         | 6        |
|                            |              |                |           | 26       |

| CMMRD                      |              |                |           |          |
|----------------------------|--------------|----------------|-----------|----------|
|                            | mature B-NHL | T- and BCP-LBL | other NHL | all NHLs |
| toxic death as first event |              |                |           |          |
| no                         | 3            | 18             | 0         | 21       |
| yes                        | 0            | 0              | 0         | 0        |
|                            |              |                |           | 21       |

| PID n. f. sp.              |              |                |           |          |
|----------------------------|--------------|----------------|-----------|----------|
|                            | mature B-NHL | T- and BCP-LBL | other NHL | all NHLs |
| toxic death as first event |              |                |           |          |
| no                         | 12           | 1              | 4         | 17       |
| yes                        | 9            | 0              | 1         | 10       |
|                            |              |                |           | 27       |

| Genetic diseases           |              |                |           |          |
|----------------------------|--------------|----------------|-----------|----------|
|                            | mature B-NHL | T- and BCP-LBL | other NHL | all NHLs |
| toxic death as first event |              |                |           |          |
| no                         | 24           | 5              | 9         | 38       |
| yes                        | 2            | 0              | 0         | 2        |
|                            |              |                |           | 40       |

**Abbreviations:** B-NHL, B-cell non-Hodgkin's lymphoma; T- and BCP-LBL, T-cell and B-cell precursor lymphoblastic lymphoma; NHL, non-Hodgkin's lymphoma; AT, ataxia telangiectasia; NBS, Nijmegen breakage syndrome; CMMRD, constitutional mismatch repair deficiency; PID n. f. sp.; primary immunodeficiency not further specified

**Suppl. Table 8. Outcome of the 3 major histological subgroups across the 5 largest distinct groups of pre-existing conditions (>20 patients)**

**A) Number of patients with and without events**

| mature B-NHL |    |     |       |               |                  |               |
|--------------|----|-----|-------|---------------|------------------|---------------|
|              | AT | NBS | CMMRD | PID n. f. sp. | genetic diseases | all disorders |
| event        |    |     |       |               |                  |               |
| no           | 7  | 5   | 1     | 9             | 17               | 39 (44%)      |
| yes          | 20 | 7   | 2     | 12            | 9                | 50 (56%)      |
|              |    |     |       |               |                  | 89            |

  

| T- and BCP-LBL |    |     |       |               |                  |               |
|----------------|----|-----|-------|---------------|------------------|---------------|
|                | AT | NBS | CMMRD | PID n. f. sp. | genetic diseases | all disorders |
| event          |    |     |       |               |                  |               |
| no             | 1  | 2   | 2     | 0             | 3                | 8 (26%)       |
| yes            | 1  | 3   | 16    | 1             | 2                | 23 (74%)      |
|                |    |     |       |               |                  | 31            |

  

| other NHLs |    |     |       |               |                  |               |
|------------|----|-----|-------|---------------|------------------|---------------|
|            | AT | NBS | CMMRD | PID n. f. sp. | genetic diseases | all disorders |
| event      |    |     |       |               |                  |               |
| no         | 0  | 0   | 0     | 3             | 5                | 8 (31%)       |
| yes        | 3  | 9   | 0     | 2             | 4                | 18 (69%)      |
|            |    |     |       |               |                  | 26            |



## B) Number of patients with and without relapse/progression

| mature B-NHL        |    |     |       |               |                  |               |
|---------------------|----|-----|-------|---------------|------------------|---------------|
|                     | AT | NBS | CMMRD | PID n. f. sp. | genetic diseases | all disorders |
| relapse/progression |    |     |       |               |                  |               |
| no                  | 24 | 9   | 2     | 18            | 19               | 72 (81%)      |
| yes                 | 3  | 3   | 1     | 3             | 7                | 17 (19%)      |
|                     |    |     |       |               |                  | 89            |

| T- and BCP-LBL      |    |     |       |               |                  |               |
|---------------------|----|-----|-------|---------------|------------------|---------------|
|                     | AT | NBS | CMMRD | PID n. f. sp. | genetic diseases | all disorders |
| relapse/progression |    |     |       |               |                  |               |
| no                  | 2  | 4   | 12    | 0             | 3                | 21 (68%)      |
| yes                 | 0  | 1   | 6     | 1             | 2                | 10 (32%)      |
|                     |    |     |       |               |                  | 31            |

| other NHLs          |    |     |       |               |                  |               |
|---------------------|----|-----|-------|---------------|------------------|---------------|
|                     | AT | NBS | CMMRD | PID n. f. sp. | genetic diseases | all disorders |
| relapse/progression |    |     |       |               |                  |               |
| no                  | 1  | 3   | 0     | 5             | 6                | 15 (58%)      |
| yes                 | 2  | 6   | 0     | 0             | 3                | 11 (42%)      |
|                     |    |     |       |               |                  | 26            |

### C) Number of patients with and without a toxic death as a first event

#### mature B-NHL

|                            | AT | NBS | CMMRD | PID n. f. sp. | genetic diseases | all disorders |
|----------------------------|----|-----|-------|---------------|------------------|---------------|
| toxic death as first event |    |     |       |               |                  |               |
| no                         | 15 | 10  | 3     | 12            | 24               | 54 (61%)      |
| yes                        | 12 | 2   | 0     | 9             | 2                | 35 (39%)      |
|                            |    |     |       |               |                  | 89            |

#### T- and BCP-LBL

|                            | AT | NBS | CMMRD | PID n. f. sp. | genetic diseases | all disorders |
|----------------------------|----|-----|-------|---------------|------------------|---------------|
| toxic death as first event |    |     |       |               |                  |               |
| no                         | 1  | 4   | 18    | 1             | 5                | 29 (94%)      |
| yes                        | 1  | 1   | 0     | 0             | 0                | 2 (6%)        |
|                            |    |     |       |               |                  | 31            |

#### other NHLs

|                            | AT | NBS | CMMRD | PID n. f. sp. | genetic diseases | all disorders |
|----------------------------|----|-----|-------|---------------|------------------|---------------|
| toxic death as first event |    |     |       |               |                  |               |
| no                         | 2  | 6   | 0     | 4             | 9                | 21 (81%)      |
| yes                        | 1  | 3   | 0     | 1             | 0                | 5 (19%)       |
|                            |    |     |       |               |                  | 26            |

**Abbreviations:** B-NHL, B-cell non-Hodgkin's lymphoma; T- and BCP-LBL, T-cell and B-cell precursor lymphoblastic lymphoma; NHL, non-Hodgkin's lymphoma; AT, ataxia telangiectasia; NBS, Nijmegen breakage syndrome; CMMRD, constitutional mismatch repair deficiency; PID n. f. sp.; primary immunodeficiency not further specified

**Suppl. Table 9. Comparison of the initial characteristics of the 3 major histological subgroups (including the 151 patients with cancer predisposition syndromes and PIDs not further specified only) with a representative cohort of patients without pre-existing conditions,**

**A) Comparison of the 96 mature B-NHL patients with the NHL-BFM 95 trial<sup>34</sup>**

|                        | NHL-BFM 95 trial  | cancer predisposition syndromes and PIDs |
|------------------------|-------------------|------------------------------------------|
| No. of patients        | 505               | 96                                       |
| Recruitment period     | 04/1996 - 03/2001 | 1984 - 2015                              |
| Gender                 |                   |                                          |
| male                   | 386 (76%)         | 60 (62.5%)                               |
| female                 | 119 (24%)         | 36 (37.5%)                               |
| Age (years) at dg.     |                   |                                          |
| median                 | 9.3               | 8.7                                      |
| range                  | 1.4 - 19.7        | 0.6 - 18.2                               |
| Histology              |                   |                                          |
| Burkitt lymphoma       | 283 (56%)         | 18 (19%)                                 |
| DLBCL                  | 97 (19%)          | 57 (59%)                                 |
| PMLBCL                 | 15 (3%)           | 1 (1%)                                   |
| others                 | 31 (6%)           | 20 (21%)                                 |
| mature B-cell leukemia | 79 (16%)          | /                                        |
| Stage                  |                   |                                          |
| I                      | 53 (10%)          | 6 (6%)                                   |
| II                     | 119 (24%)         | 20 (21%)                                 |
| III                    | 221 (44%)         | 43 (45%)                                 |
| IV                     | 33 (7%)           | 14 (15%)                                 |
| mature B-cell leukemia | 79 (16%)          | /                                        |
| not available          | /                 | 13 (14%)                                 |

## B) Comparison of the 31 LBL patients with the NHL-BFM 95 trial<sup>31</sup>

|                    | NHL-BFM 95 trial  | cancer predisposition syndromes and PIDs |
|--------------------|-------------------|------------------------------------------|
| No. of patients    | 156               | 31                                       |
| Recruitment period | 04/1995 - 03/2001 | 1984 - 2015                              |
| Gender             |                   |                                          |
| male               | 98 (63%)          | 24 (77%)                                 |
| female             | 58 (37%)          | 7 (23%)                                  |
| Age (years) at dg. |                   |                                          |
| <10                | 91 (58%)          | 18 (58%)                                 |
| 10 - 14            | 48 (31%)          | 6 (19%)                                  |
| >14                | 17 (11%)          | 7 (23%)                                  |
| Histology          |                   |                                          |
| T-LBL              | 126 (81%)         | 28 (90%)                                 |
| BCP-LBL            | 26 (17%)          | 3 (10%)                                  |
| others             | 4 (3%)            | /                                        |
| Stage              |                   |                                          |
| I                  | /                 | 1 (3%)                                   |
| II                 | /                 | 1 (3%)                                   |
| III                | 116 (74%)         | 23 (74%)                                 |
| IV                 | 40 (26%)          | 5 (16%)                                  |
| not available      | /                 | 1 (3%)                                   |

### C) Comparison of the 8 ALCL patients with the EICNHL ALCL99 trial<sup>43</sup>

|                    | EICNHL ALCL99 trial | cancer predisposition syndromes and PIDs |
|--------------------|---------------------|------------------------------------------|
| No. of patients    | 352                 | 8                                        |
| Recruitment period | 11/1999 - 12/2005   | 1984 - 2015                              |
| Gender             |                     |                                          |
| male               | 211 (60%)           | 3                                        |
| female             | 141 (40%)           | 5                                        |
| Age (years) at dg. |                     |                                          |
| <3                 | 19 (5%)             | 3                                        |
| 3 - 16             | 308 (88%)           | 4                                        |
| >16                | 25 (7%)             | 1                                        |
| Stage              |                     |                                          |
| I                  | 24 (7%)             | 1                                        |
| II                 | 66 (19%)            | 0                                        |
| III                | 222 (63%)           | 5                                        |
| IV                 | 40 (11%)            | 1                                        |
| not available      | /                   | 1                                        |

**Abbreviations:** NHL-BFM 95 trial, non-Hodgkin's lymphoma Berlin-Frankfurt-Münster 95 trial; EICNHL ALCL99 trial, European Intergroup for Childhood non-Hodgkin's lymphoma anaplastic large cell lymphoma 99 trial; PIDs, primary immunodeficiencies; No., number; dg., diagnosis; DLBCL, diffuse large B-cell lymphoma; PMLBCL, primary mediastinal large B-cell lymphoma; T-LBL, T-cell lymphoblastic lymphoma; BCP-LBL, B-cell precursor lymphoblastic lymphoma

## **Supplemental Figures**

**Suppl. Figure 1.** 5-year event-free and overall survival rates (1-A) and 5-year cumulative incidence rates of relapse and treatment-related death (1-B) of the 213 patients with pre-existing conditions and NHL.

**Suppl. Figure 2.** 10-years cumulative incidence of secondary malignancies of the 151 patients with cancer predisposition syndromes (n=124) and PIDs not further specified (n=27): overall (2-A) and according to the pre-existing conditions (2-B).

**Suppl. Figure 3.** 7-year overall survival rate of the 21 patients with a secondary malignancy.

# Event Free Survival

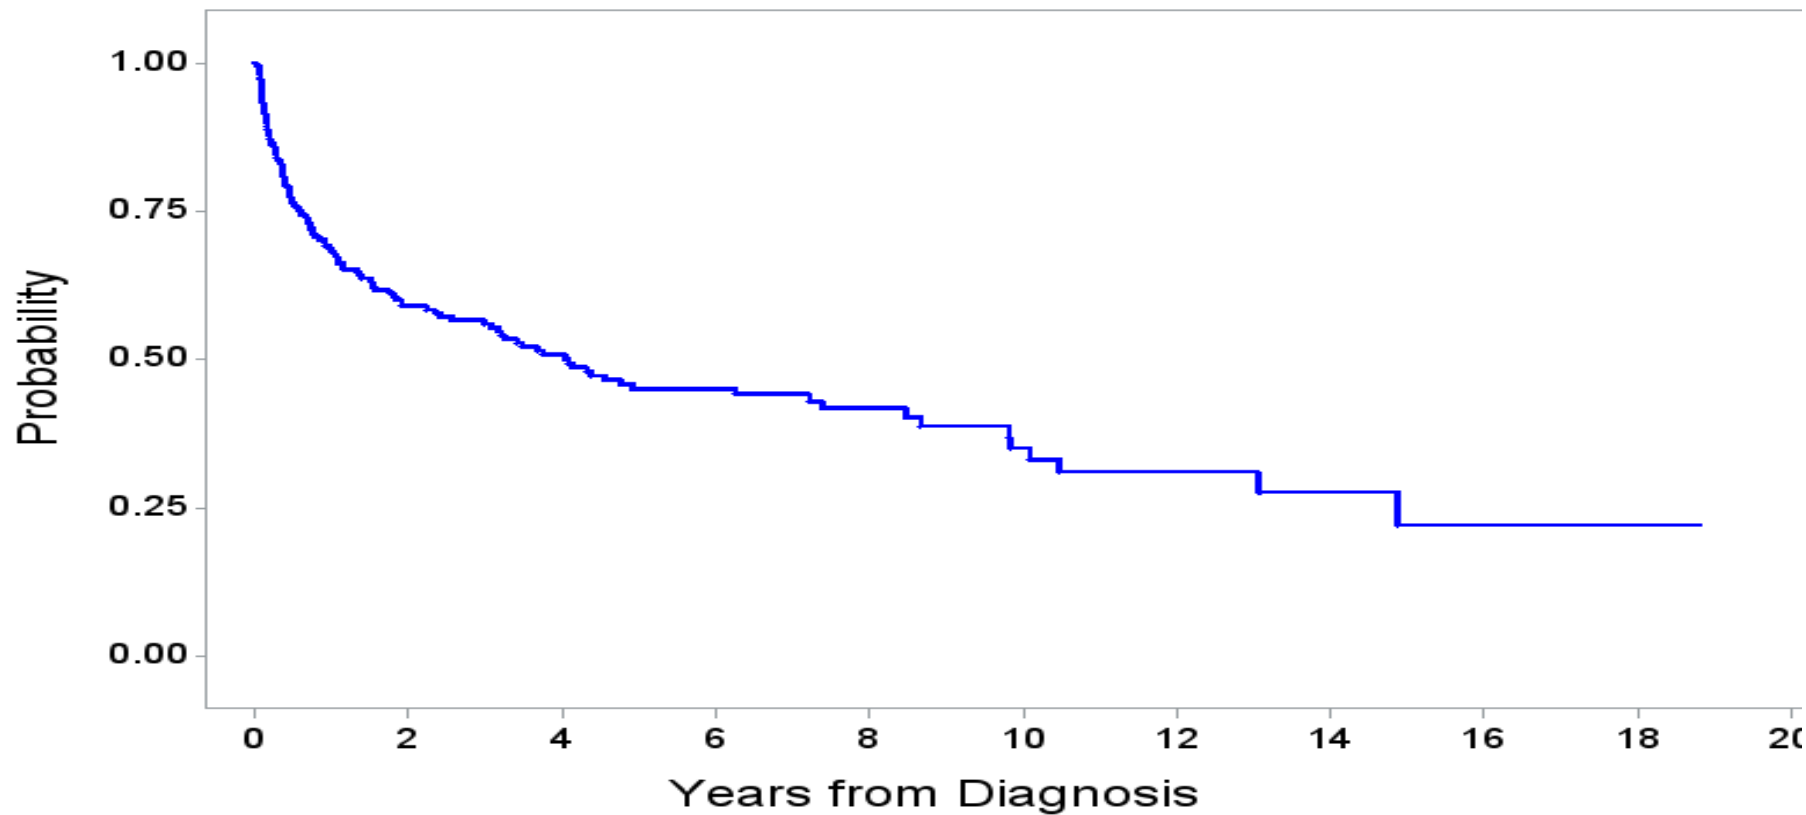

**5-year probability of event-free survival (EFS): n=213, 117 events: 45%±4%**



# Overall Survival

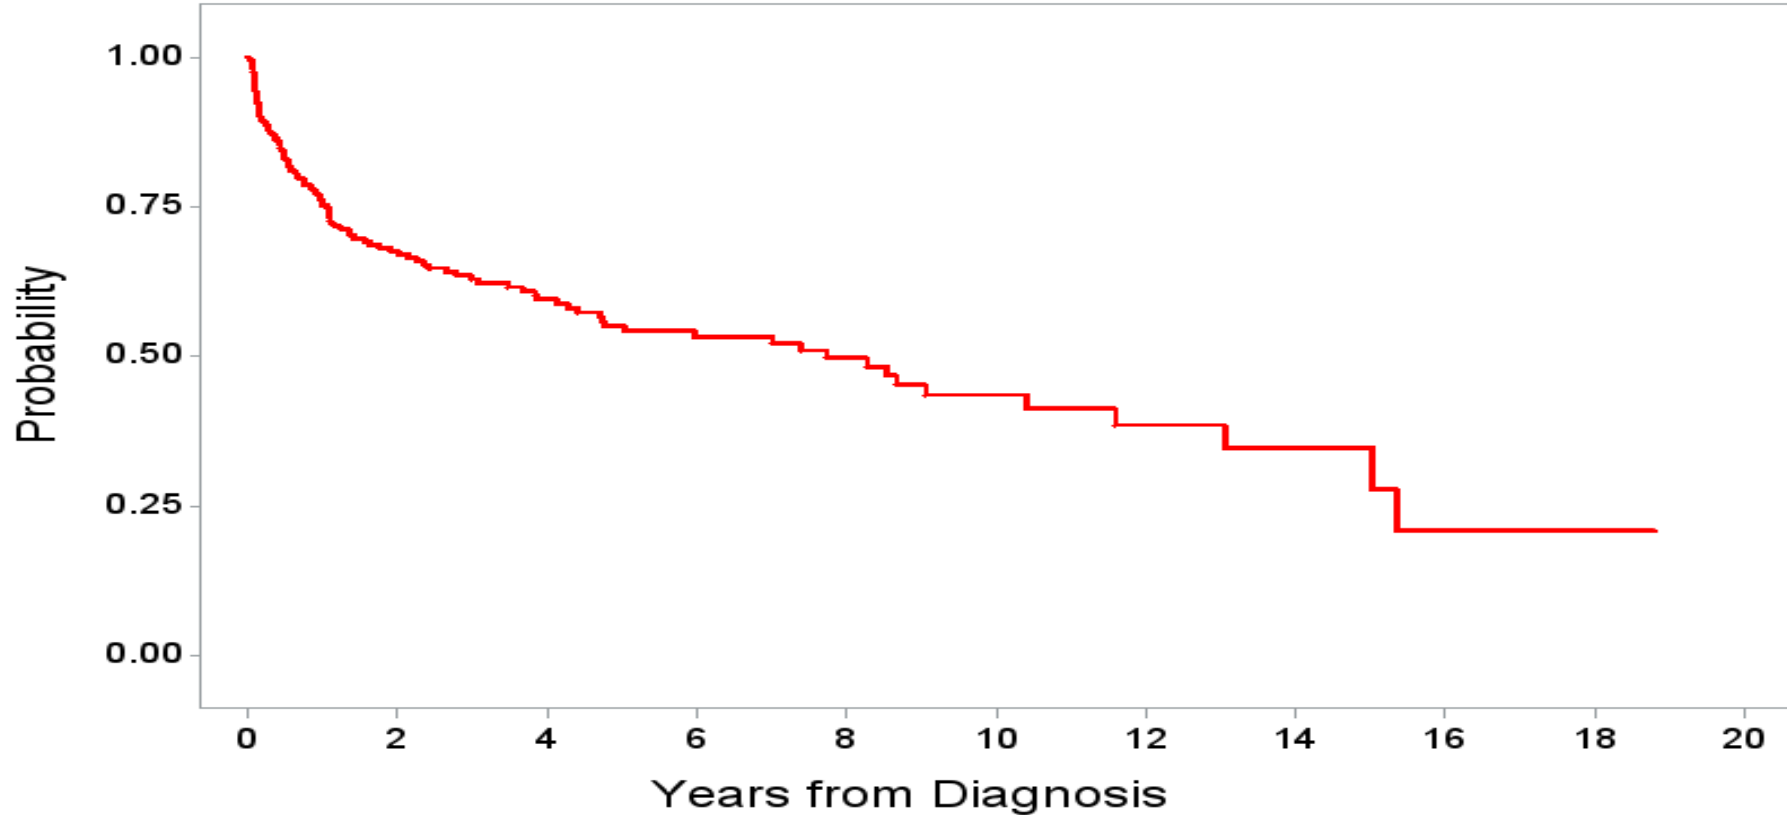

**5-year probability of overall survival (OS): n=213, 100 events: 54%±4%**

### CI of Relapse

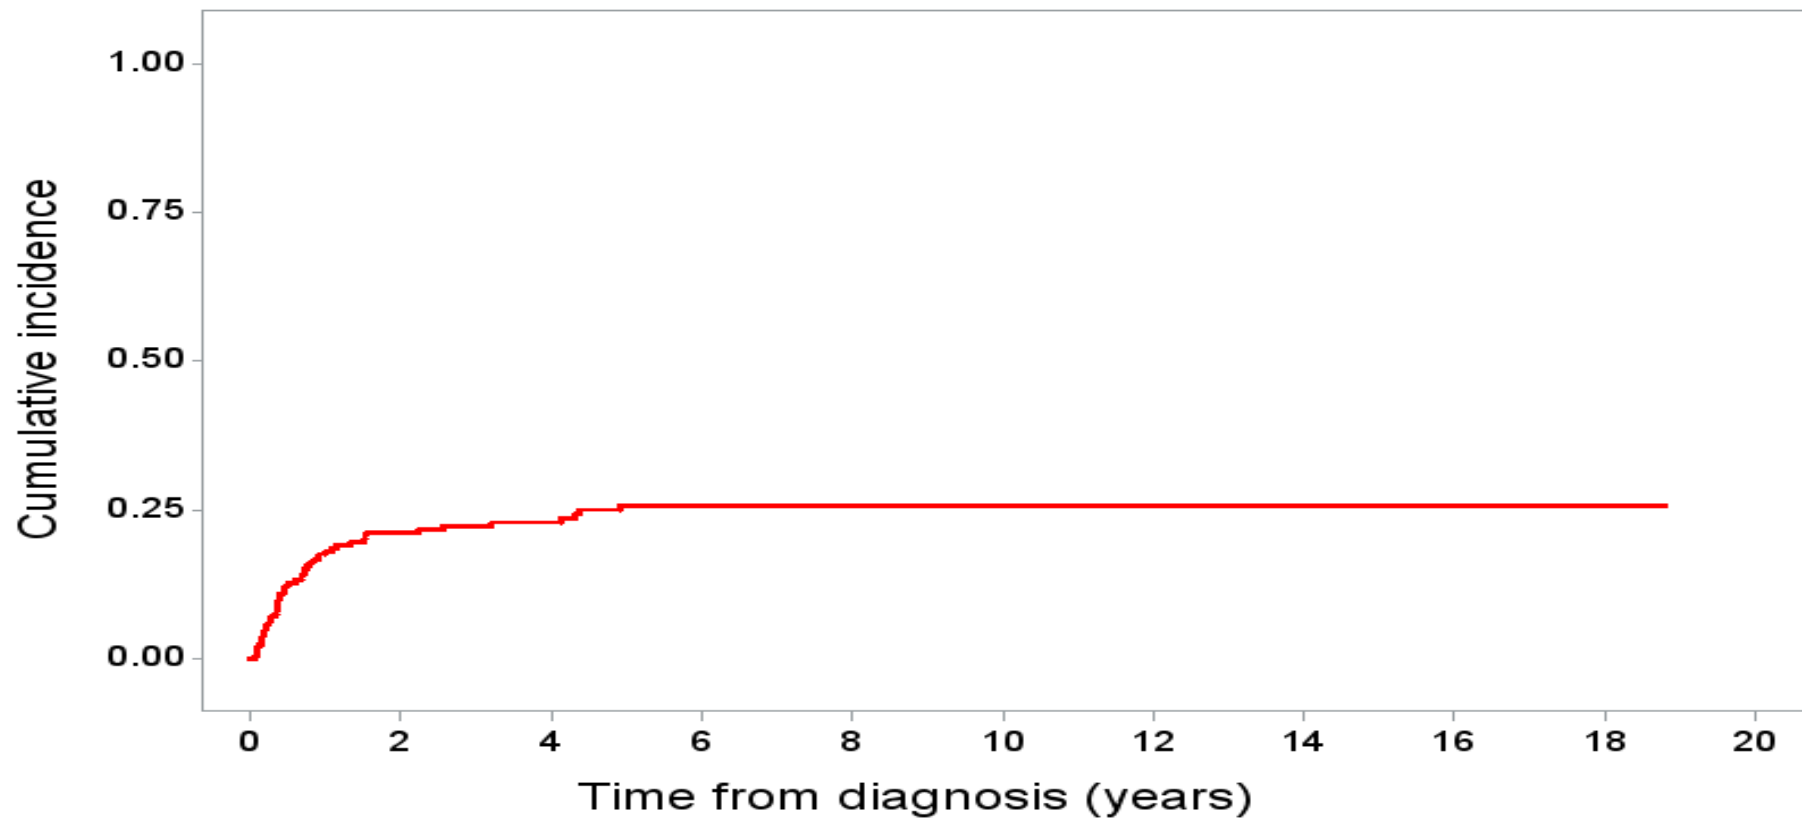

**5-year cumulative incidence of relapse (CIR): n=213, 51 events: 26%±3%**

### CI of Death

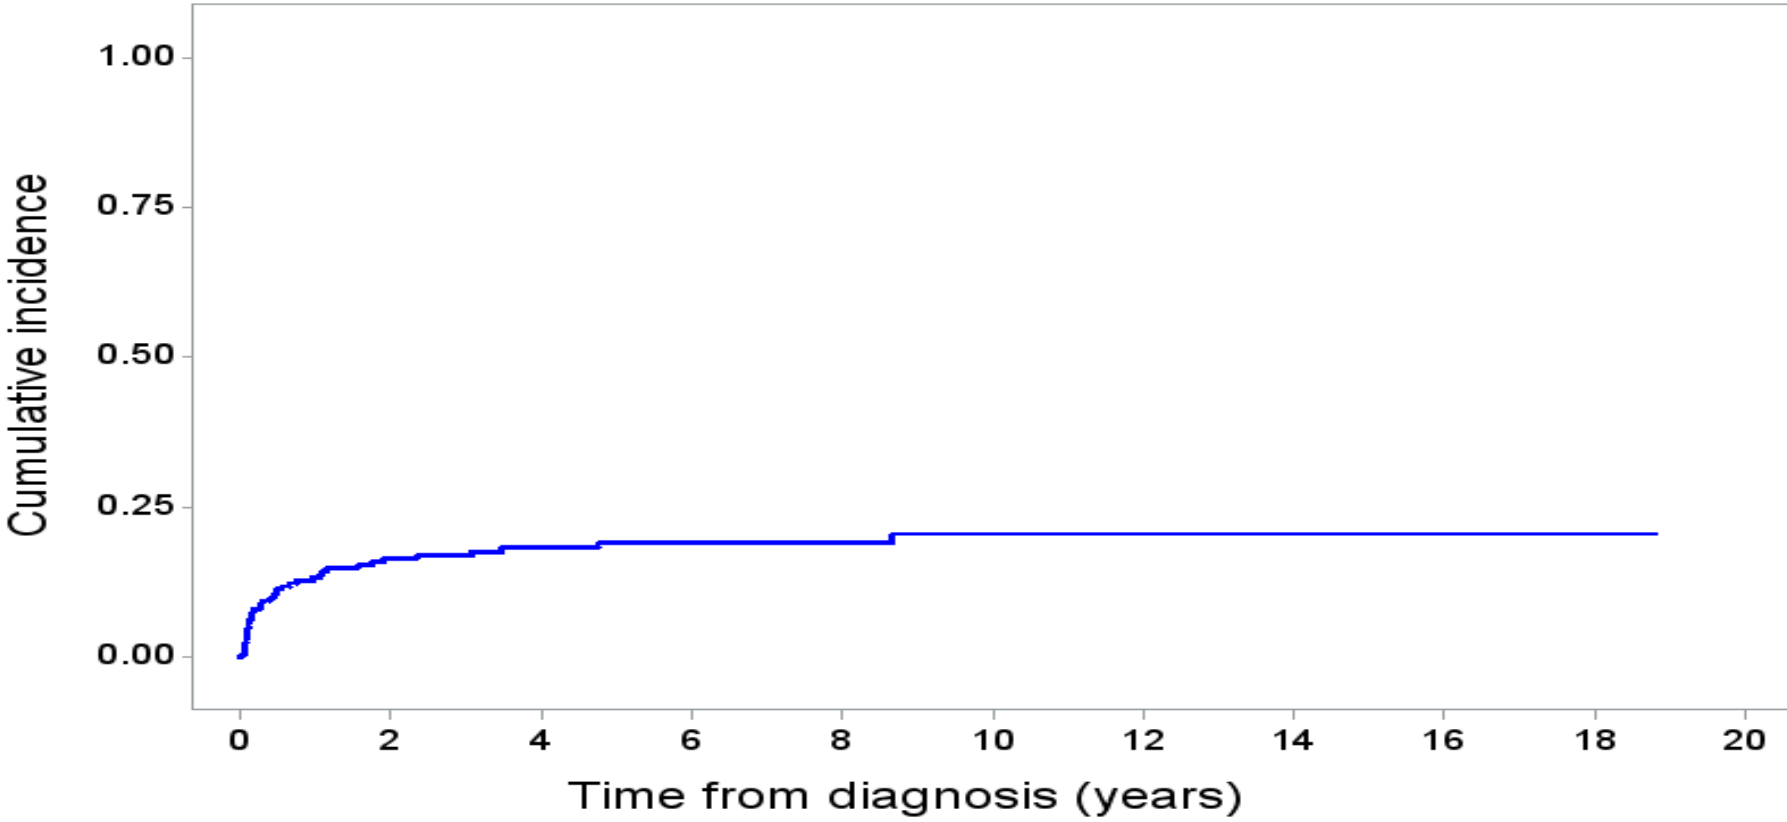

**5-year cumulative incidence of death (CID) as a first event: n=213, 39 events: 19% $\pm$ 3%**

### CI of SMLs

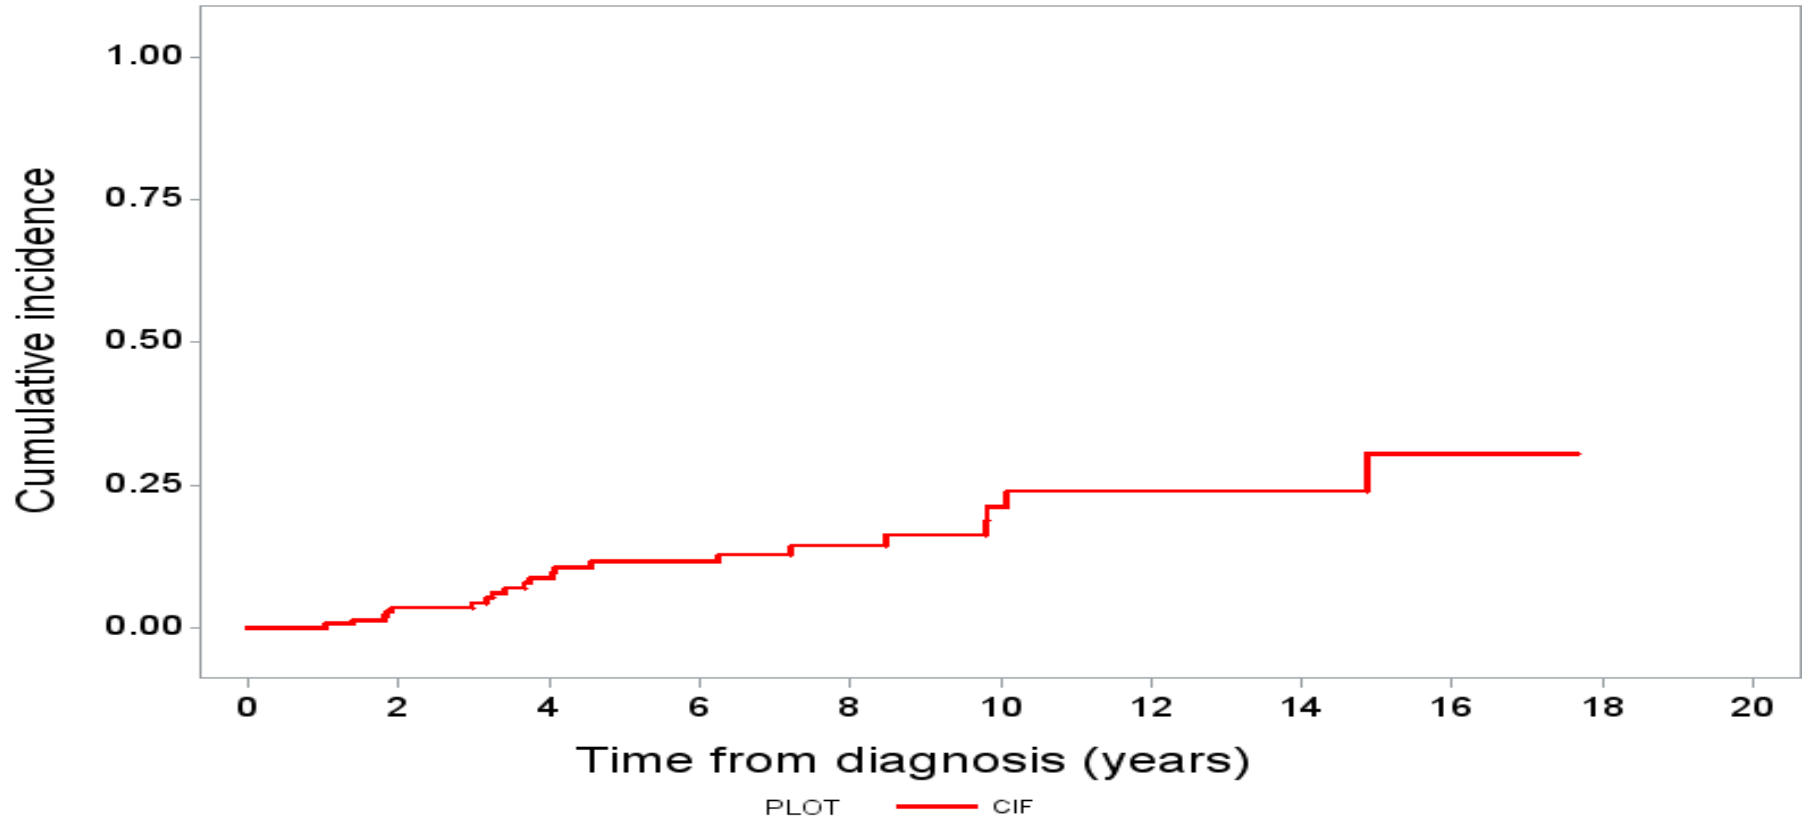

**10-years cumulative incidence of secondary malignancies: n=151, 21 events: 24%±5%**

### CI of SMLs

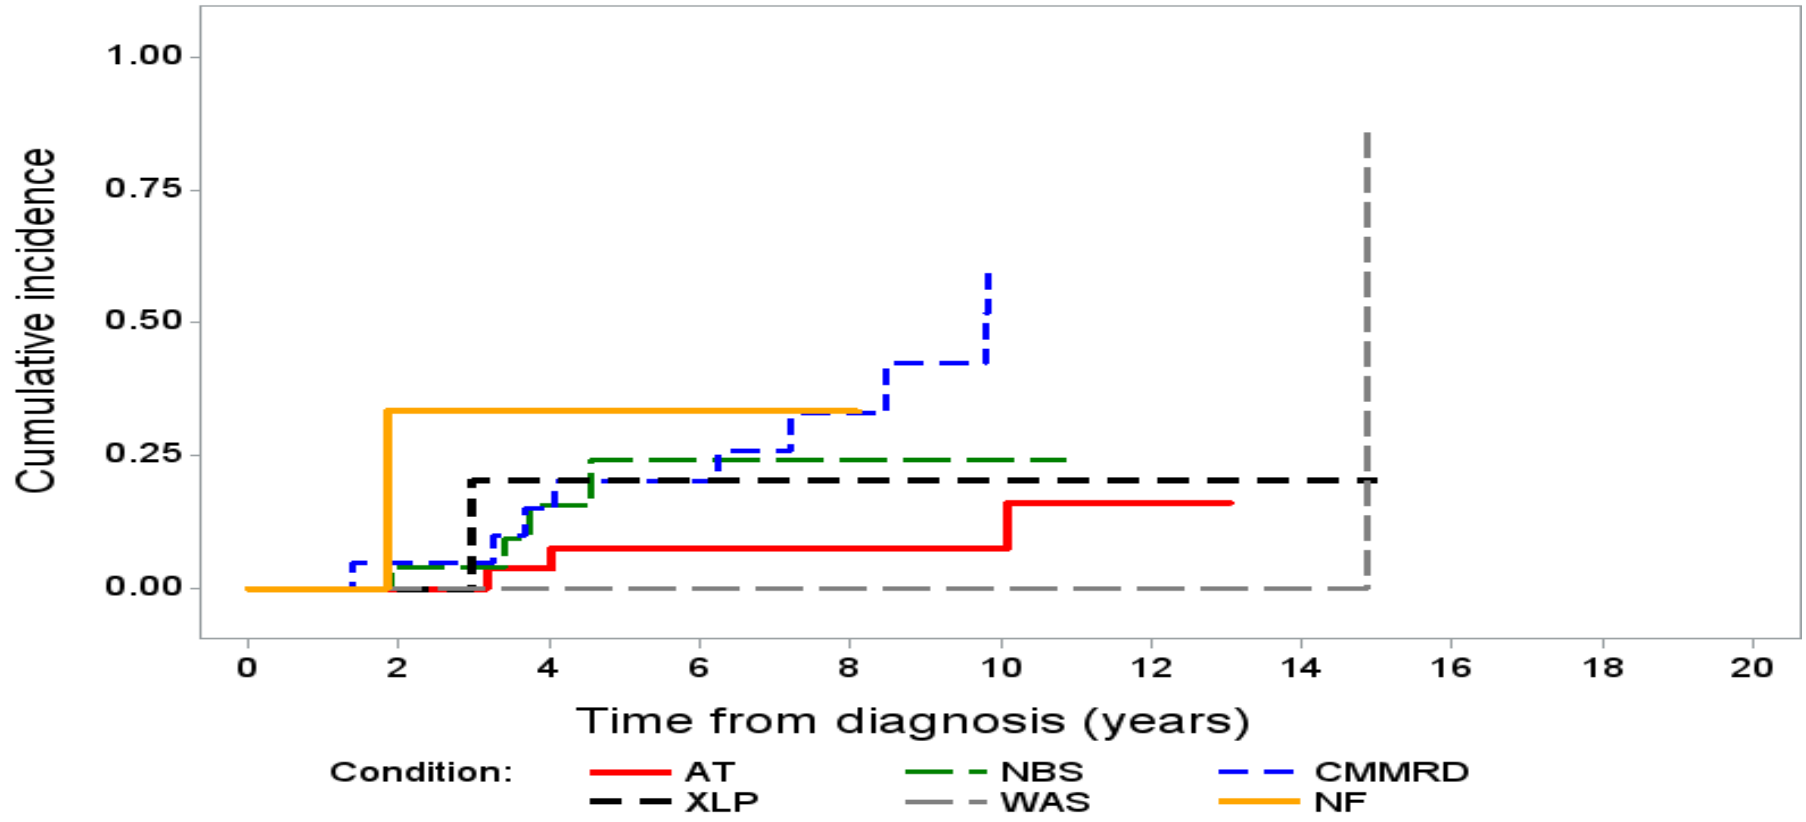

|                                                       |                        |                |                |
|-------------------------------------------------------|------------------------|----------------|----------------|
| <b>10-years cumulative incidence of SML in AT:</b>    | <b>n=32, 3 events:</b> | <b>16%±11%</b> |                |
| <b>10-years cumulative incidence of SML in NBS:</b>   | <b>n=26, 4 events:</b> | <b>24%±12%</b> |                |
| <b>10-years cumulative incidence of SML in CMMRD:</b> | <b>n=21, 9 events:</b> | <b>61%±15%</b> |                |
| <b>10-years cumulative incidence of SML in XLP:</b>   | <b>n=11, 1 event:</b>  | <b>20%±21%</b> |                |
| <b>10-years cumulative incidence of SML in WAS:</b>   | <b>n=7, 1 event:</b>   | <b>0%</b>      |                |
| <b>10-years cumulative incidence of SML in NF:</b>    | <b>n=3, 1 event:</b>   | <b>33%±33%</b> | <b>P=0.075</b> |

# Overall Survival

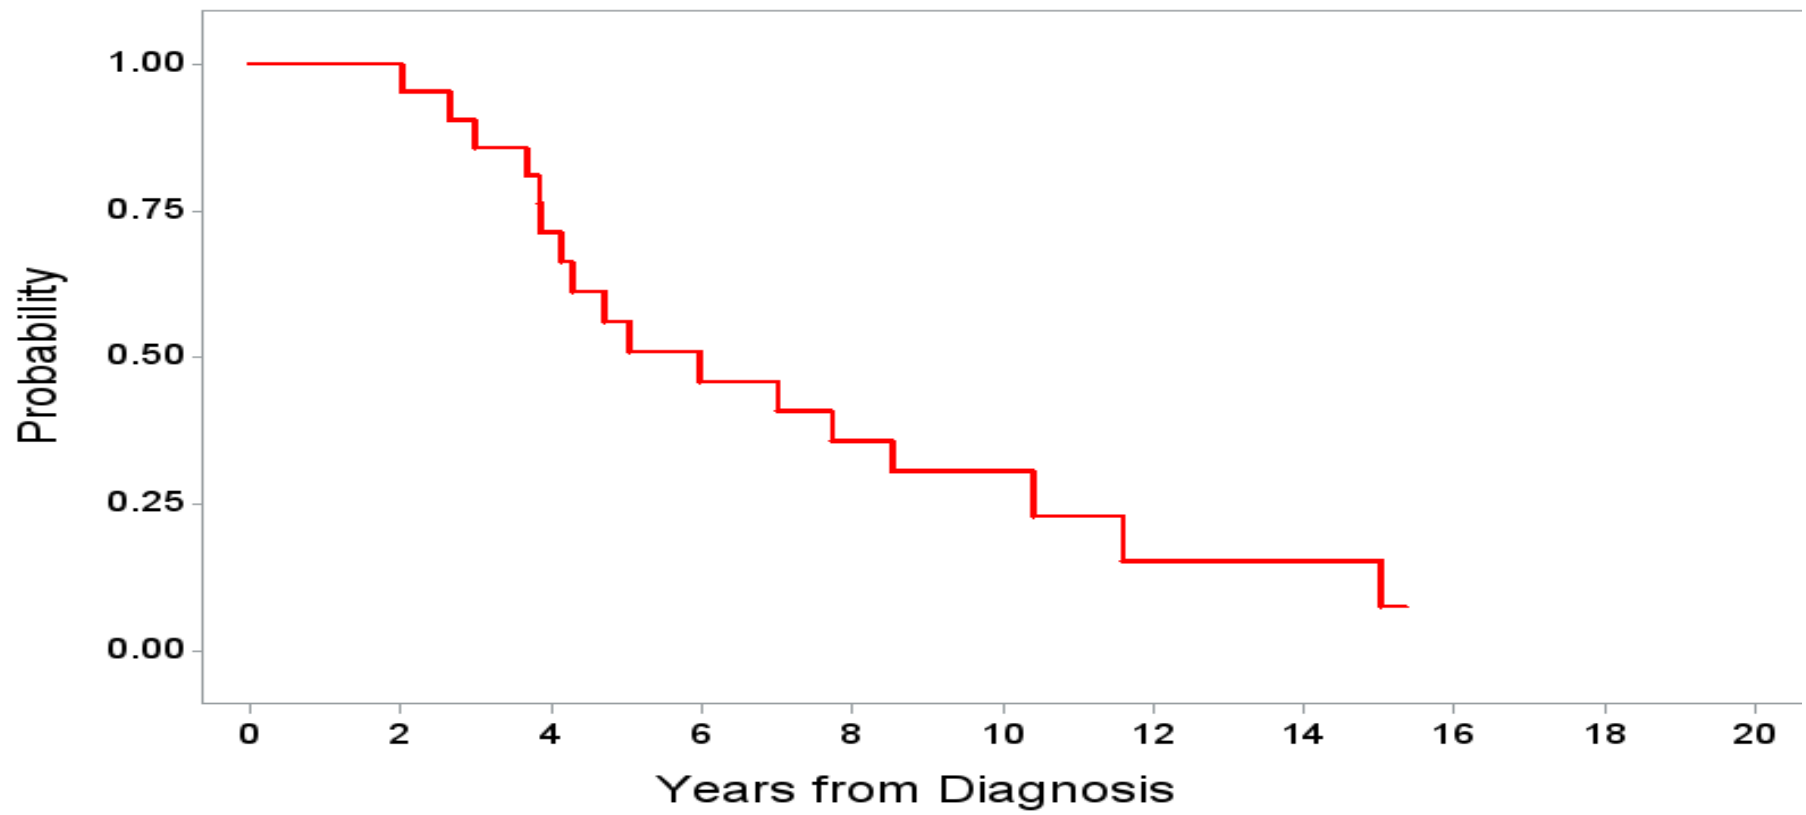

**7-year probability of overall survival: n=21, 18 events: 41%±11%**
