# Supplementary material
Source: PubMed Central journal article supplement (PMC5479624)
Supplement: fd9bdc9fdf90d5e3fc796c1b6d96e2f7_2016_147116-Disclosures_and_Contributions.pdf [file fd9bdc9fdf90d5e3fc796c1b6d96e2f7_2016_147116-Disclosures_and_Contributions.pdf]

Haematologica  
HAEMATOL/2016/147116  
Version 4

Non-Hodgkin's lymphoma and pre-existing conditions: spectrum,  
clinical characteristics and outcome in 213 children and adolescents

Andishe Attarbaschi, Elisa Carraro, Oussama Abla, Shlomit  
Barzilai-Birenboim, Simon Bomken, Laurence Brugieres, Eva  
Bubanska, Birgit Burkhardt, Alan KS Chiang, Monika Csoka, Alina  
Fedorova, Janez Jazbec, Edita Kabickova, Zdenka Krenova, Jelena  
Lazic, Jan Loeffen, Georg Mann, Felix Niggli, Natasha Miakova, Tomoo  
Osumi, Leila Ronceray, Anne Uyttebroeck, Denise Williams, Wilhelm  
Woessmann, Grazyna Wrobel, and Marta Pillon

Disclosures: none

Contributions: AA, MP, DW and LB designed and planned the study; AA, MP, EC and LR were in charge of data pooling, data checking and statistical analysis; all other authors (OA, S. Barzilai-Birenboim, S. Bomken, EB, BB, AC, MC, AF, JJ, EK, ZK, J. Lazic, J. Loeffen, GM, FN, NM, TO, AU, WW, GW) as well as AA, LB, DW and MP were principal or co-investigators in their study groups and institutions, coordinated the national trials in their countries, provided study materials, recruited patients and wrote the manuscript. All authors read and approved the final version of the manuscript.
